# Supplementary material for: Synthesis and Characterization of Ceramide-Containing Liposomes as Membrane Models for Different T Cell Subpopulations
Source: MDPI journal article supplement (doi:10.3390/jfb13030111), 2022-08-02
Supplement: s1 [file s1]

## SUPPLEMENTAL INFORMATION:

### Synthesis and characterization of ceramide-containing liposomes as membrane models for different T cell subpopulations

Sascha Eder <sup>1</sup>, Claudia Hollmann <sup>2°</sup>, Putri Mandasari <sup>2°</sup>, Pia Wittmann <sup>1,2</sup>, Fabian Schumacher <sup>3</sup>, Burkhard Kleuser <sup>3</sup>, Julian Fink <sup>4</sup>, Jürgen Seibel <sup>4</sup>, Jürgen Schneider-Schaulies <sup>2</sup>, Christian Stigloher <sup>5</sup>, Niklas Beyersdorf <sup>2+</sup> and Sofia Dembski <sup>1,6+\*</sup>

<sup>1</sup> Fraunhofer Institute for Silicate Research, ISC, Würzburg, Germany; eder.sascha@freenet.de; pia.wittmann@stud-mail.uni-wuerzburg.de; sofia.dembski@isc.fraunhofer.de

<sup>2</sup> University of Würzburg, Institute for Virology and Immunobiology, Würzburg, Germany; claudia.hollmann@gmx.net; putri.mandasari@uni-wuerzburg.de; pia.wittmann@stud-mail.uni-wuerzburg.de; jss@vim.uni-wuerzburg.de; niklas.beyersdorf@vim.uni-wuerzburg.de

<sup>3</sup> Freie Universität Berlin, Institute of Pharmacy, Berlin, Germany; burkhard.kleuser@fu-berlin.de; fabian.schumacher@fu-berlin.de

<sup>4</sup> University of Würzburg, Institute of Organic Chemistry, Würzburg, Germany; julian.fink@uni-wuerzburg.de; seibel@chemie.uni-wuerzburg.de;

<sup>5</sup> University of Würzburg, Imaging Core Facility of the Biocenter, Würzburg, Germany; christian.stigloher@uni-wuerzburg.de

<sup>6</sup> Department Tissue Engineering and Regenerative Medicine, University Hospital, Würzburg, Germany; sofia.dembski@isc.fraunhofer.de

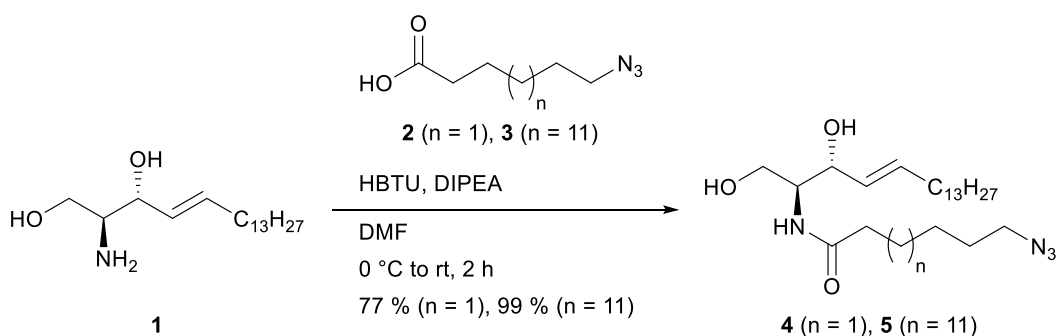

**Scheme S1.** Synthesis of the azido-modified ceramide probes  $\omega$ -N<sub>3</sub>-C<sub>6</sub>-Cer (**4**) and  $\omega$ -N<sub>3</sub>-C<sub>16</sub>-Cer (**5**).

## NMR Spectra

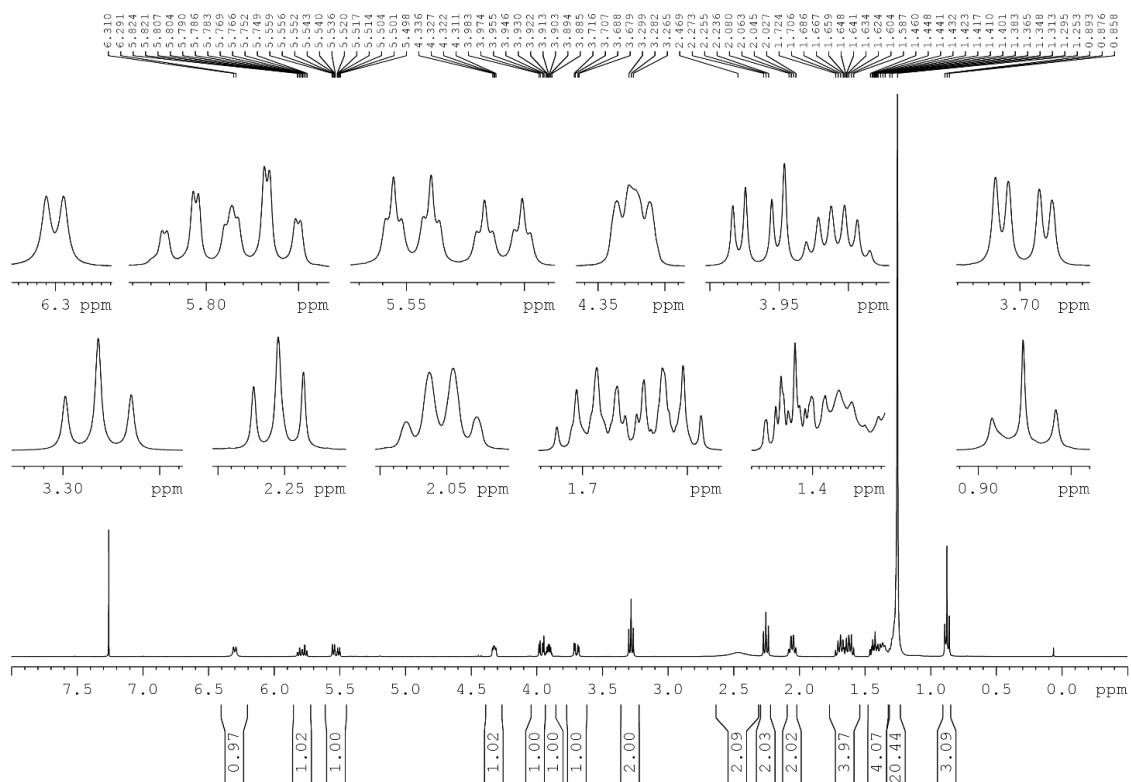

**Figure S1.** <sup>1</sup>H-NMR spectrum (CDCl<sub>3</sub>, 400 MHz) of  $\omega$ -N<sub>3</sub>-C<sub>6</sub>-Cer (**4**).

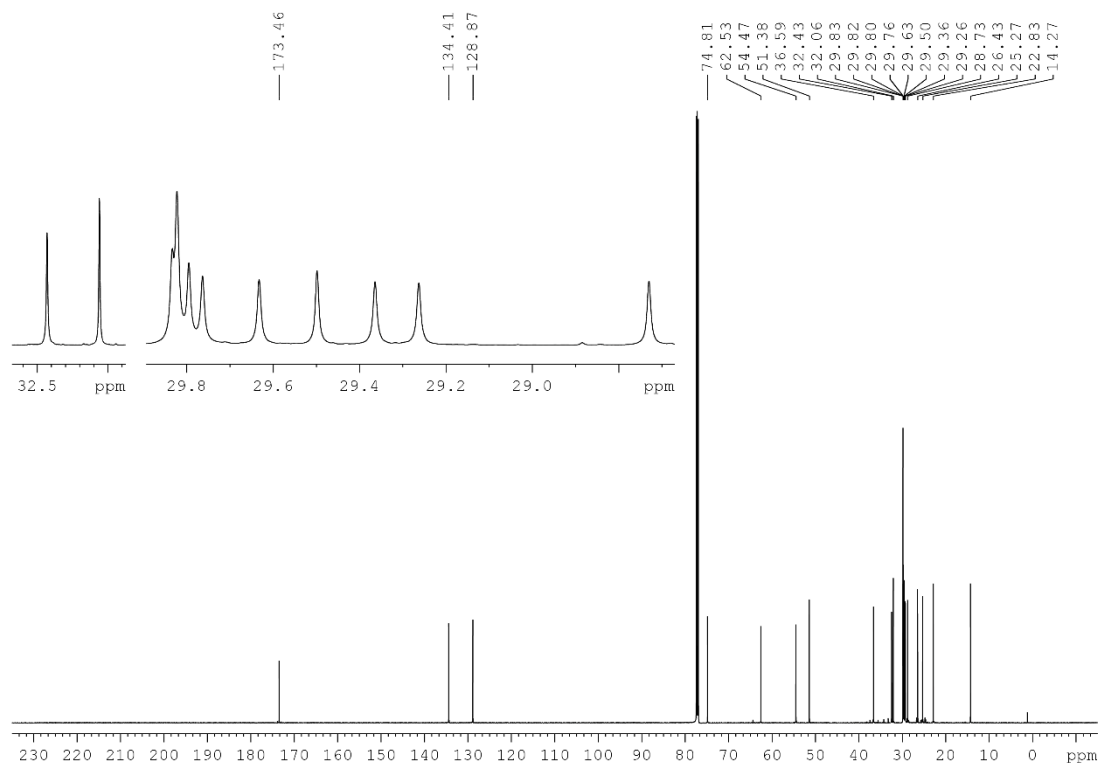

**Figure S2.** <sup>13</sup>C-NMR spectrum (CDCl<sub>3</sub>, 150 MHz) of  $\omega$ -N<sub>3</sub>-C<sub>6</sub>-Cer (**4**).

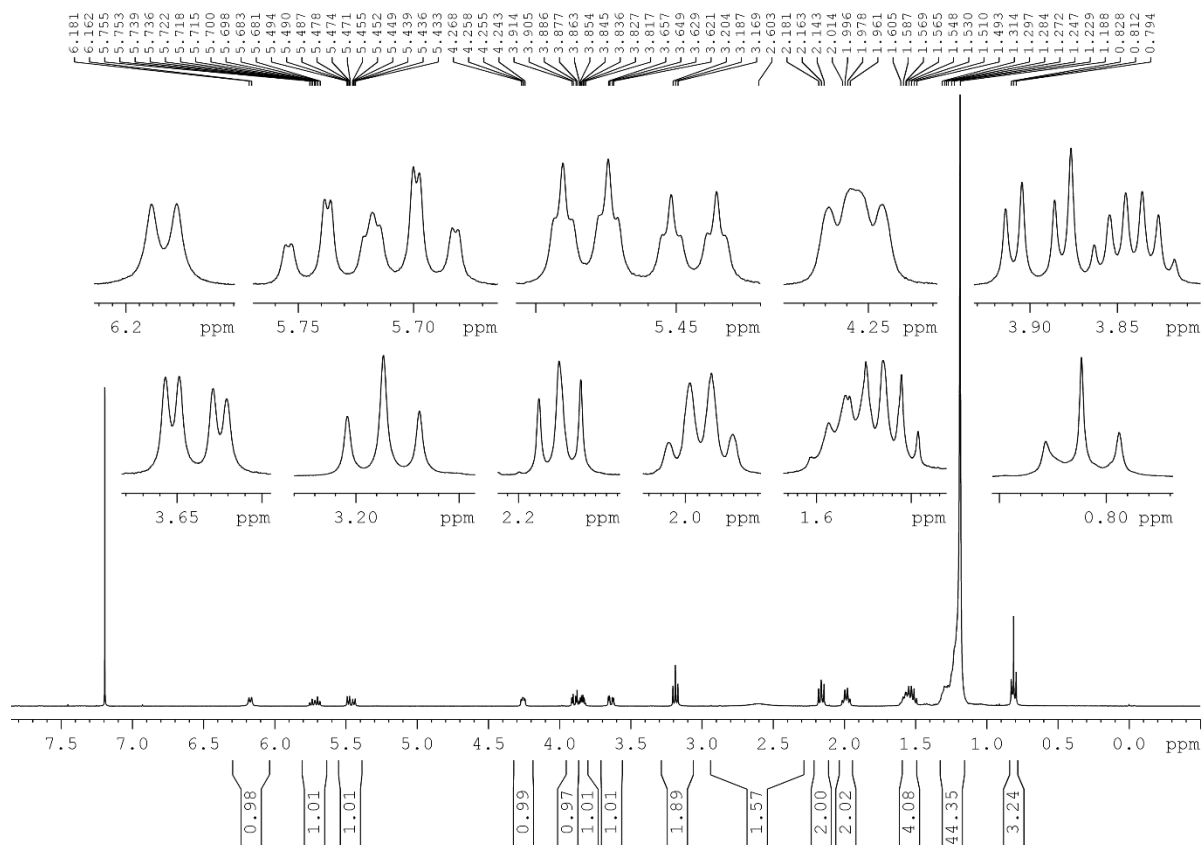

**Figure S3.**  $^1\text{H}$ -NMR spectrum ( $\text{CDCl}_3$ , 400 MHz) of  $\omega\text{-N}_3\text{-C}_{16}\text{-Cer}$  (**5**).

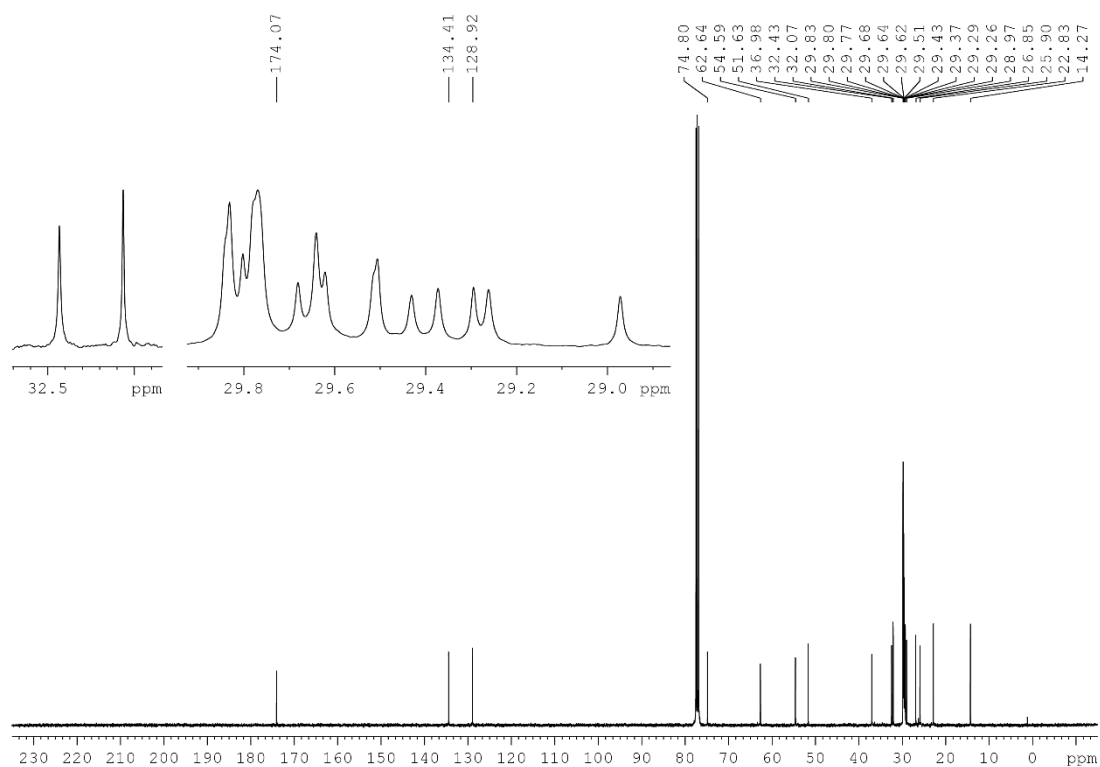

**Figure S4.**  $^{13}\text{C}$ -NMR spectrum ( $\text{CDCl}_3$ , 100 MHz) of  $\omega\text{-N}_3\text{-C}_{16}\text{-Cer}$  (**5**).

## Mass Spectra

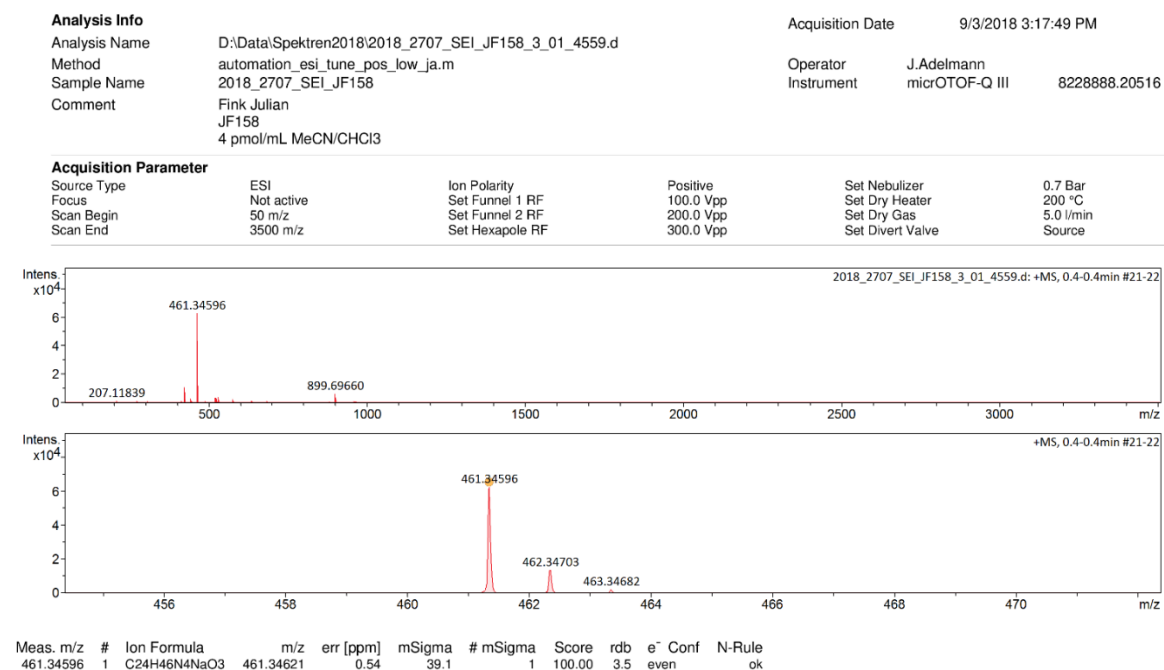

**Figure S5.** Mass spectrum (ESI<sup>+</sup>) of  $\omega$ -N<sub>3</sub>-C<sub>6</sub>-Cer (4).

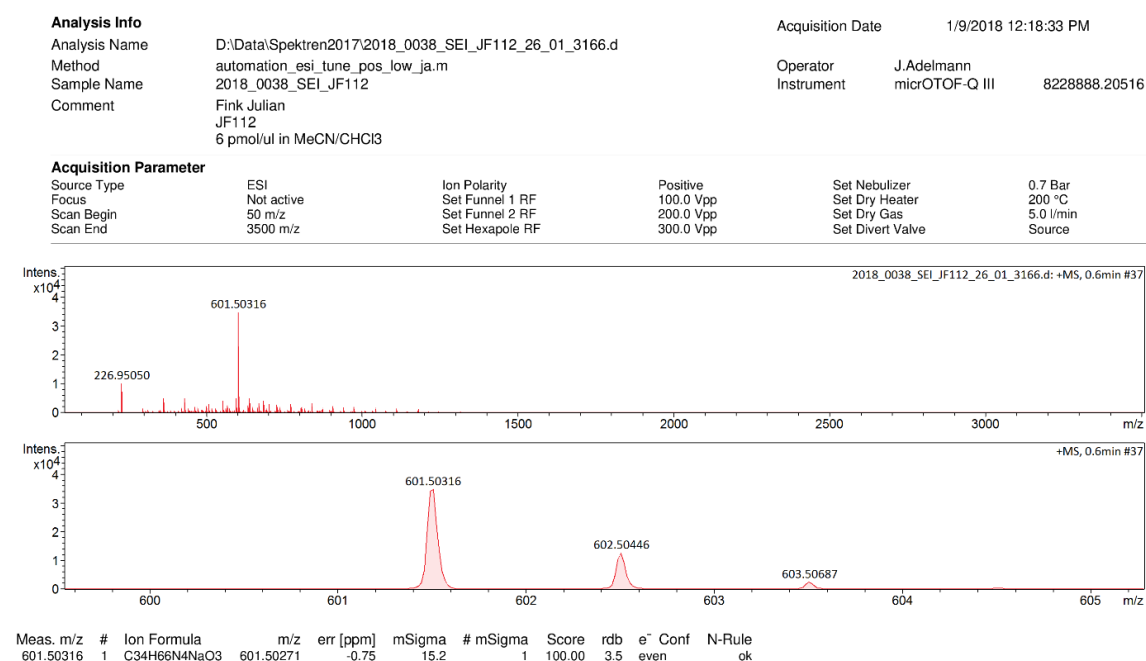

**Figure S6.** Mass spectrum (ESI<sup>+</sup>) of  $\omega$ -N<sub>3</sub>-C<sub>16</sub>-Cer (5).
